# Supplementary material for: Peptaibol-Containing Extracts of Trichoderma atroviride and the Fight against Resistant Microorganisms and Cancer Cells
Source: MDPI journal article supplement (doi:10.3390/molecules26196025), 2021-10-04
Supplement: s1 [file s1]

## Supplementary materials

# Peptaibol-Containing Extracts of *Trichoderma atroviride* and the Fight Against Resistant Microorganisms and Cancer Cells

Ján Víglaš<sup>1,\*</sup>, Simona Dobiasová<sup>2</sup>, Jitka Viktorová<sup>2</sup>, Tomáš Ruml<sup>2</sup>, Vanda Repiská<sup>3</sup>, Petra Olejníková<sup>1</sup> and Helena Gbelcová<sup>3</sup>

<sup>1</sup> Institute of Biochemistry and Microbiology, Faculty of Food and Chemical Technology, Slovak University of Technology in Bratislava, 812 37 Bratislava, Slovakia; petra.olejnikova@stuba.sk

<sup>2</sup> Department of Biochemistry and Microbiology, University of Chemistry and Technology Prague, 166 28 Prague, Czech Republic; simka.dobiasova@gmail.com (S.D.), jitka.prokesova@vscht.cz (Jitka Viktorová), tomas.ruml@vscht.cz (T.R.)

<sup>3</sup> Institute of Medical Biology, Genetics and Clinical Genetics, Faculty of Medicine, Comenius University, Bratislava, Špitálska 24, 813 72 Bratislava, Slovakia; vanda.repiska@fmed.uniba.sk (V.R.), helen.gbelcova@fmed.uniba.sk (H.G.)

\* Correspondence: jan.viglas@stuba.sk

**Figure S1 – S3** depict fragmentation of chosen ions in the range corresponding to atroviridins/peptaibols of *Trichoderma atroviride* (Figure 1). The presence of  $\alpha$ -amino isobutyric acid (Aib) suggest the identity of compounds as peptaibols, while also the spectra themselves bears features of MALDI-TOF/TOF measured peptaibol spectra by Brito *et al.* (2014) [21] and Katoch *et al.* (2019) [22] – increased number of peaks and partial sequences, but sufficient to provide evidence for presence of Aib – characteristic for peptaibols. Annotation of the sequence (indication of amino acids) was performed using FlexAnalysis programme (Bruker Daltonics, Billerica, Massachusetts, USA). Canonical amino acids are indicated using single-letter code, while  $\alpha$ -amino isobutyric acid, isoleucine and isovaline are indicated as Aib, Ile and Iva, respectively.

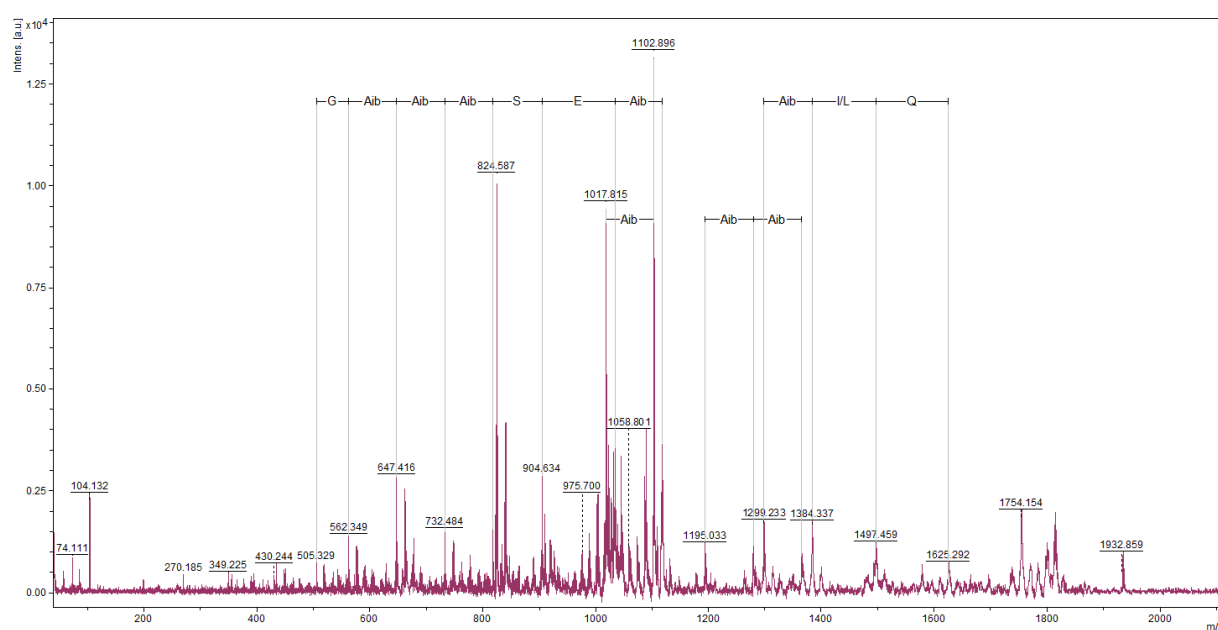

**Figure S1.** MALDI-TOF/TOF (MS/MS) spectrum of fragmented ion  $m/z$  1932.

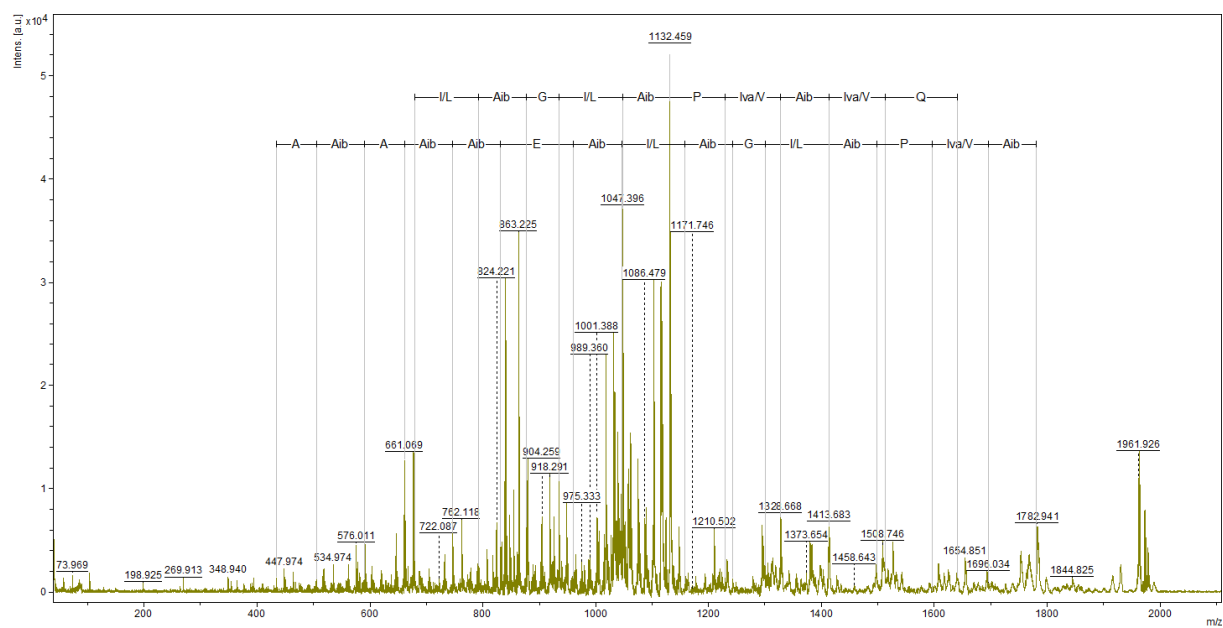

**Figure S2.** MALDI-TOF/TOF (MS/MS) spectrum of fragmented ion  $m/z$  1962.

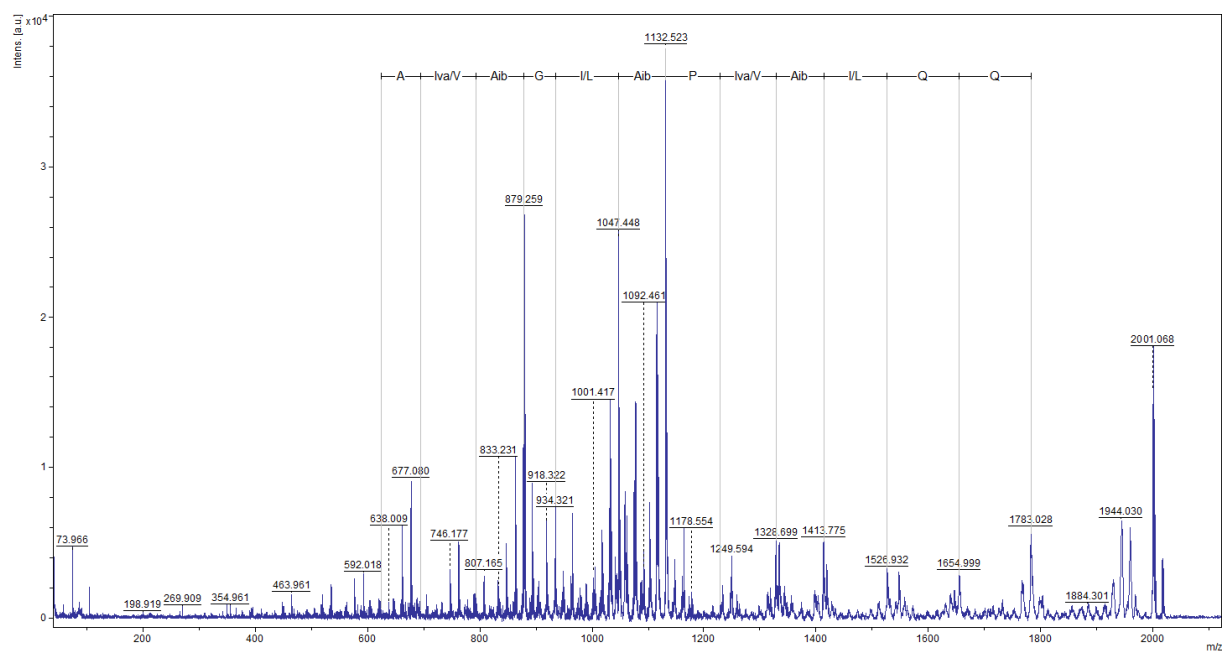

**Figure S3.** MALDI-TOF/TOF (MS/MS) spectrum of fragmented ion  $m/z$  2001.
